# Supplementary material for: 3-Component palladium–indium mediated diastereoselective cascade allylation of imines with allenes and aryl iodidesElectronic supplementary information (ESI) available: experimental details. See http://www.rsc.org/suppdata/cc/b2/b202940e/
Source: Royal Society of Chemistry journal article supplement (doi:10.1039/b202940e), 2002-05-23
Supplement: b202940e.doc [file b202940e.doc]

## **Supplementary data**

## **General**

Nuclear magnetic resonance spectra were recorded on Bruker DPX250 and DPX500 instruments operating at 250 and 500 MHz respectively. Chemical shifts are given in parts per million () downfield from tetramethylsilane (TMS) as internal standard. Coupling constants are given in Hertz (Hz). Unless otherwise stated, deuteriochloroform was used as solvent. The following abbreviations are used to denote peak multiplicity’s: s = singlet, bs = broad singlet, d = doublet, dd = double doublet, t = triplet, td = triplet of doublets and m = multiplet.

Melting points were determined on a Reichert apparatus and are uncorrected. Mass spectral data were obtained from a VG Autospec instrument operating at 70 eV (EI) or ZD 2000 electrospray instrument (ES). Microanalyses were obtained using a Carbo Erba MOD11016 instrument and IR analyses were collected on a Nicolet Magna FT-IR 560 spectrometer.

Column chromatography was performed using flash silica gel 60 and t.l.c. plates where silica gel 60 F254 with plastic backing (Merck).

Solvents were dried according to established methods, unless purchased from Aldrich in sure seal bottles. The term petrol refers to the 40-60 oC boiling point fraction of petroleum ether. When allene was used in experiments it was charged to 1 bar pressure using the following procedure. All reagents and solvent are added to a Schlenk tube, which is subsequently sealed. The mixture is then frozen in a bath of liquid nitrogen and the Schlenk tube evacuated to a pressure of approximately 1 Torr. The solvent is then degassed by allowing the frozen mixture to thaw under vacuum. This process is then repeated. Allene is then added to the frozen, degassed mixture at 1 bar. The mixture is then allowed to reach room temperature and stirring/heating can commence.

All the compounds are named according to the IUPAC system and were obtained using the ACD/iLAB web service.

***Preparation of imines***

Isatin-imines1, sulfonimines2 and sulfinimines3 were prepared following literature procedures.

***General procedure for palladium-indium mediated Barbier-type allylation of imines with allenes.***

Imine (1 mmol), aryl iodide (1.5 mmol), indium powder (1.5 mmol), tris-2-furyl phosphine (0.2 mmol), palladium (II) acetate (0.1 mmol) and DMF (10 cm3) were added to an oven-dried Schlenk tube. Allene was added at 1 bar following the standard procedure. The solution was stirred at either 80C for 24h (isatin-imines and sulfonimines) or 100C for 48-60 h (sulfinimines). The reaction mixture was cooled to room temperature, vented, diluted with diethyl ether (10 cm3) and then quenched with 5% aqueous HCl (10 cm3). The layers were separated and the aqueous layer extracted with diethyl ether (3 x 20 cm3). The combined extracts were washed with water (4 x 5 cm3), dried (MgSO4) and evaporated under reduced pressure. The residue was purified by flash chromatography, eluting with mixtures of petrol/ethyl acetate or petrol/ether affording the products **6**-**9**, **17**-**21** and **27**-**31**.

**3-Anilino-1-methyl-3-(2-phenyl-2-propenyl)-1,3-dihydro-*2H*-indol-2-one (6).**

Colourless needles from EtOAc/petrol, m.p. 171-173 C. (Found C, 81.05; H, 6.4; N, 7.7; C24H22N2O requires C, 81.3; H, 6.25; N, 7.9 %); H (250 MHz); 2.99 (3 H, s, NMe), 3.13 (1 H, d, 2JHH 12.9, CHAHB), 3.26 (1 H, d, 2JHH 12.9, CH2), 4.31 (1 H, br s, NH), 4.92 (1 H, s, C=CH2), 5.15 (1 H, s, C=CH2), 6.02 (2 H, m, Ar-H) and 6.59-7.26 (12 H, m, Ar-H); m/z (ES, %) 377 (M++Na, 20), 285 (100), 269 (12) and 260 (75); *v*max/cm-1 (film) 3335 (NH), 1713 (C=O), 1613, 1604, 1469 and 1314.

**3-[(4-methoxyphenyl)amino]-1-methyl-3-(2-phenyl-2-propenyl)-1,3-dihydro-*2H*-indol-2-one (7).**

Colourless needles from ether, mp. 136-138 C; (Found: C, 77.9; H, 6.1; N, 7.1; C25H24N2O2 requires C, 78.1; H, 6.3; N, 7.3 %); H (250 MHz) 2.03 (3 H, s, NMe), 3.16 (1 H, d, 2JHH 12.9, CHAHB), 3.24 (1 H, d, 2JHH 12.9, CH2), 3.58 (3 H, s, OMe), 4.10 (1 H, bs, OH), 4.92 (1 H, s, C=CH2), 5.07 (1 H, s, C=CH2), 6.14 (2 H, d, J 8.9, ArH), 6.48 (2 H, d, J 8.9, ArH), 6.68 (2 H, d, J 8.9, ArH), 6.85 (1 H, td, J 7.4 and 0.9, ArH), 7.05 (3 H, m, ArH), 7.20 (4 H, m, ArH); m/z (ES, %) 407 (M+, 30), 290 (58) and 285 (100). *v*max/cm-1 (film) 3345 (NH), 1716 (C=O) and 1614.

**1-methyl-3-[4-methylphenyl)amino]-3-(2-phenylprop-2-enyl)-1,3-dihydro-*2H*-indol-2-one (8)**

Colourless needles from ether, mp. 87-89 C; (Found: C, 81.2; H, 6.7; N, 7.4; C25H24N2O requires C, 81.5; H, 6.6; N, 7.6 %); H (250 MHz); 2.08 (3 H, s, Me), 2.95 (3 H, s, NMe), 3.13 (1 H, d, J 12.8, CH2), 3.19 (1 H, d, J 12.8, CH2), 4.19 (1 H, s, NH), 4.91 (1 H, s, C=CH2), 5.11 (1 H, s, C=CH2), 5.99 (2H, d, 8.5, ArH), 6.71 (3 H, m, ArH), 6.82 (1 H, t, J 8.2, ArH), 6.99-7.22 (7 H, m, ArH);m/z (ES, %); 391 (M++ Na, 100); *v*max/cm-1 (film) 3355 (NH), 1716 (C=O), 1615 and 1521.

**3-anilino-1-methyl-3-(2-thien-2-yl prop-2-enyl)-1,3-dihydro-*2H*-indol-2-one (9)**

#### Colourless needles from DCM/petrol, mp. 166-169 C; (Found: C, 73.3; H, 5.75; N, 7.8; C22H20NO2S requires C, 73.3; H, 5.60; N, 7.8 %); H (250 MHz) 3.03 (1 H, d, J 13.0, CH2), 3.11 (3 H, s, NMe), 3.21 (1 H, d, J 13.0, CH2), 4.49 (1 H, bs, OH), 4.80 (1 H, s, C=CH2), 5.33 (1 H, s, C=CH2), 6.09 (2 H, m, ArH), 6.61 (1 H, t, J 7.3, ArH), 6.81 (1 H, d, J 8.0, ArH), 6.85-7.24 (8 H, m, ArH); m/z (ES, %); 383 (M+, 100); *v*max/cm-1 (film) 3356(NH), 1716 (C=O), 1605 and 1604.

***N*-(1,3-diphenylbut-3-enyl)-4-methylbenzenesulfonamide (17).**

Colourless oil (Found: C, 73.1; H, 6.1; N, 3.7; C23H23SO2N requires C, 73.2; H, 6.15 and N; 3.7 %); H (500 MHz) 2.34 (3 H, s, NMe), 2.89 (2 H, dd J 7.4 and 0.9, CH2), 4.22 (1 H, td J 7.4 and 4.9, CH), 4.89 (1 H, d J 4.9, NH), 4.96 (1 H, s, C=CH2), 5.25 (1 H, s, C=CH2), 7.04 (4 H, m, ArH), 7.16-7.27 (8H, m, ArH) and 7.43 (2 H, d J 8.3, ArH); m/z (ES, %); 400 (M+ + Na, 100); *v*max/cm-1 (film) 3278 (NH), 1324 and 1157.

***N*-[1-(4-methoxyphenyl)-3-phenylbut-3-enyl]-4-methylbenzenesulfonamide (18)**

Colourless needles, mp. 80-83 C; (Found: C, 70.6; H, 6.15; N, 3.4; C24H25NSO3 requires C, 70.7; H, 6.20; N, 3.4 %); H (250 MHz); 2.34 (3 H, s, Me), 2.84 (1 H, dd, 2JHH 14.4 and J 7.2, CH2), 2.92 (1 H, dd 2JHH 14.4 and J 7.2, CH2), 3.73 (3 H, s, OMe) 4.17 (1 H, td J 7.2 and 5.0, CH), 4.94 (1 H, s, C=CH2), 5.01 (1 H, d J 5.0, NH), 5.22 (1 H, s, C=CH2), 6.68 (2 H, d, J, 8.8, ArH), 6.93 (2 H, d, J, 8.8, ArH), 7.05 (2 H, d, J, 8.3, ArH), 7.16-7.28 (5 H, m, Ph) and 7.44 (2 H, d, J, 8.3, ArH); m/z (ES, %); 430 (M+ + Na, 100); *v*max/cm-1 (film) 3277 (NH), 1513, 1247 and 1156.

***N-*[3-(2-hydroxyphenyl)-1-(4-methoxyphenyl)but-3-enyl]-4-methylbenzenesulfonamide (19).**

Colourless needles from DCM/petrol, mp. 142-144 C; (Found: C, 67.8; H, 5.95; N, 3.4 %; C24H25SO4N requires C, 68.1; H, 5.95 and N; 3.3 %); H (250 MHz) 2.36 (3 H, s, Me), 2.83 (1 H, dd 2JHH 14.2 and J 7.5, CH2), 3.03 (1 H, dd 2JHH 14.2 and J 7.5, CH2), 3.74 (3 H, s, OMe), 4.11 (1 H, td J 7.5 and 6.0, CH), 4.78 (1 H, d J 5.5, NH), 5.13 (1 H, s, C=CH2), 5.23 (1 H, s, C=CH2), 5.29 (1 H, s, OH), 6.67 (2H, d 8.7, ArH), 6.83 (2H, d 8.7, ArH), 6.89 (2 H, m, ArH), 7.02 (1 H, m, ArH), 7.10 (2H, d 8.3, ArH), 7.19 (1 H, m, ArH) and 7.44 (2H, d 8.3, ArH); m/z (ES, %); 446 (M+ + Na, 100); *v*max/cm-1 (film) 3415 (OH), 3278 (NH), 1513, 1247 and 1155.

***N*-[1,3-benzodioxol-5-yl)-3-phenylbut-3-enyl]-4-methylbenzenesulfonamide (20).**

Colourless needles from DCM/petrol, mp. 110-112 C; (Found: C, 68.2; H, 5.50; N, 3.3; C24H23NSO4 requires C, 68.4; H, 5.50; N, 3.3 %); H (250 MHz) 2.36 (3 H, s, Me), 2.84 (2 H, d J 7.2, CH2), 4.11 (1 H, td J 7.2 and 4.2, CH), 4.75 (1 H, d, J 4.2, NH), 4.99 (1 H, d J 1.1, C=CH2), 5.27 (1 H, d J 1.1, C=CH2), 5.89 (1 H, d J 5.7, OCH2O), 5.89 (1 H, d J 5.7, OCH2O), 6.52 (2 H, m, ArH), 6.62 (1 H, d J 7.9, ArH), 7.07 (2 H, d J 8.3, ArH), 7.09-7.28 (5 H, m, ArH) and 7.43 (2 H, d J 8.3, ArH); m/z (ES, %); 444 (M+ + Na, 100); *v*max/cm-1 (film) 3277 (NH), 1489 and 1446.

***N-*[3-(4-fluoro-2-methylphenyl)-1-phenylbut-3-enyl]-4-methylbenzenesulfonamide (21).**

Colourless needles, mp. 118-121 C. (Found: C, 70.2; H, 5.8; N, 3.3; C23H24SO2NF requires C, 70.4; H, 5.9 and N; 3.4 %); H (250 MHz) 2.11 (1 H, s, Me), 2.37 (1 H, s, Me), 2.73 (1 H, dd 2JHH 14.5 and J 7.3, CH2), 2.83 (1 H, dd 2JHH 14.5 and J 7.3, CH2), 4.14 (1 H, td J 7.3 and 5.4, CH), 4.78 (1 H, d J 5.4, NH), 4.94 (1 H, s, C=CH2), 5.05 (1 H, s, C=CH2), 6.45 (1 H, dd, J 9.5 and 2.7, H3), 6.86 (1 H, td J 8.4 and 2.7, H2), 6.97 (1 H, m, H1), 7.06-7.17 (5 H, m, ArH), 7.11 (2 H, d 8.4, ArH) and 7.44 (2 H, d 8.4, ArH); m/z (ES, %) 432 (M+ + Na, 100); *v*max/cm-1 (film) 3275 (NH), 1494 and 1157.

### *N*-[1-(4-cyanophenyl)-3-phenylbut-3-enyl]-2-methylpropane-2-sulfinamide (27)

Colourless oil, H (250 MHz); 1.14 (9 H, s, C(CH3)3), 2.88 (1 H, dd, J, 14.2 and 8.7 Hz, CH2), 2.98 (1 H, dd, J, 14.2 and 5.7 Hz, CH2), 3.69 (1 H, bs, NH), 4.53 (1 H, m, CH), 5.09 (1 H, s, C=CH2), 5.37 (1 H, s, C=CH2), 7.35 (5 H, m, Ph), 7.38 (2 H, d, J, 8.3 Hz, ArH), 7.61 (2 H, d, J, 8.3 Hz, ArH); C (63 MHz); 22.8 (C(CH3)3), 45.3 (CH­2), 56.2 (CH), 56.7 (CMe3), 111.9, 117.3, 119.1, 126.7, 128.6, 128.8, 129.2, 132.7, 140.2, 144.6, 147.7; m/z (EI, %) 352 (M+ , 1), 278 (2) and 178 (100); *v*max/cm-1 (film); 3180 (NH), 2228 (CN) and 1608.

***N*-[1-(4-acetylphenyl)-3-phenylbut-3-enyl]-2-methylpropane-2-sulfinamide (28)**

Colourless oil, (Found: C, 71.4; H, 7.4; N, 3.7; C22H27SO2N requires C, 71.5; H, 7.4 and N; 3.8 %); H (250 MHz); 1.13 (9 H, s, C(CH3)3), 2.61 (3 H, s, Me), 2.89 (1 H, dd, J, 13.8 and 8.0 Hz, CH2), 2.99 (1 H, dd, J, 13.8 and 5.8 Hz, CH2), 3.68 (1 H, bs, NH), 4.54 (1 H, m, CH), 5.11 (1 H, s, C=CH2), 5.37 (1 H, s, C=CH2), 7.31-7.39 (7 H, m, ArH), 7.9 (2 H, d, J, 8.4 Hz, ArH); m/z (ES, %) 392 (M+ + Na, 100), 370 (M+ + H, 30) and 252 (20) *v*max/cm-1 (film); 3185 (NH), 1683 (C=O) and 1608

**Methyl(4-(1-[*tert*-butylsulfinyl)amino]-3-phenylbut-3-enyl)benzoate (29)**

Colourless needles from ether/petrol, mp 107-110°C, (Found: C, 68.3; H, 6.9; N, 3.8; C22H27NSO3 requires C, 68.5; H, 7.05 and N; 3.6 %); H (250 MHz); 1.13 (9 H, s, C(CH3)3), 2.92 (1 H, dd, J, 14.2 and 8.6 Hz, CH2), 2.96 (1 H, dd, J, 14.2 and 5.3 Hz, CH2), 3.67 (1 H, bs, NH), 3.92 (3 H, s, CO2Me), 4.51 (1 H, m, CH), 5.10 (1 H, s, C=CH2), 5.36 (1 H, s, C=CH2), 7.33-7.38 (7 H, m, ArH), 7.98 (2 H, d, J, 8.3 Hz, ArH); C (63 MHz); 22.9 (C(CH3)3), 45.4 (CH­2), 52.5 (CO2*C*H3), 56.1 (CH), 56.7 (CMe3), 117.0, 126.8, 128.0, 128.5, 129.1, 130.0, 130.2, 140.4, 144.9, 147.4 and 167.5 (C=O); m/z (ES, %) 408 (M+ + Na, 100), 386 (M+ + H, 28) and 268 (70); *v*max/cm-1 (film); 3185 (NH), 1722 (C=O) and 1279

***N*-[1-(4-trifluoromethylphenyl)-3-phenylbut-3-enyl]-2-methylpropane-2-sulfinamide (30)**

Colourless oil, (Found: C, 63.7; H, 6.0; N, 3.3; C21H24SONF3 requires C, 63.8; H, 6.1 and N; 3.5 %); H (250 MHz); 1.14 (9 H, s, C(CH3)3), 2.88 (1 H, dd, J, 14.5 and 8.5 Hz, CH2), 2.99 (1 H, dd, J, 14.5 and 5.4 Hz, CH2), 3.70 (1 H, bs, NH), 4.53 (1 H, m, CH), 5.11 (1 H, s, C=CH2), 5.37 (1 H, s, C=CH2), 7.33-7.37 (5 H, m, Ph), 7.38 (1 H, d, J, 8.1 Hz, ArH) and 7.57 (1 H, d, J, 8.1 Hz, ArH); C (63 MHz); 22.9 (C(*C*H3)3, 45.8 (CH2), 56.1 (CH), 56.6 (C), 117.1, 125.7, 125.8, 126.8, 128.3, 128.5, 129.1, 130.0 (quartet, CF3), 140.4, 144.9, 146.2; m/z (ES, %) 418 (M+ + Na, 100), 396 (M+ + H, 35) and 278 (65); *v*max/cm-1 (film); 3190 (NH), 1618 and 1325

***N*-(3-(3-methoxyphenyl)-1-[4-(trifluoromethyl)phenyl]but-3-enyl)-2-methylpropane-2-sulfinamide (31)**

Colourless solid (Found: C, 62.3; H, 6.4; N, 3.5; C22H26SO2NF3 requires C, 62.1; H, 6.2 and N; 3.3 %); H (250 MHz); 1.14 (9 H, s, C(CH3)3), 2.87 (1 H, dd, J, 14.5 and 8.3 Hz, CH2), 2.96 (1 H, dd, J, 14.5 and 5.5 Hz, CH2), 3.69 (1 H, bs, NH), 3.82 (3 H, s, OMe), 4.55 (1 H, m, CH), 5.11 (1 H, s, C=CH2), 5.37 (1 H, s, C=CH2), 6.84-6.97 (3 H, m, ArH), 7.24-7.28 (1H, ArH), 7.39 (1 H, d, J, 8.0 Hz, ArH) and 7.57 (1 H, d, J, 8.0 Hz, ArH); m/z (ES, %) 448 (M+ + Na, 100), 426 (M+ + H, 40), 370 (30) and 278 (80); *v*max/cm-1 (film); 3185 (NH) and 1325.

### References

1. R.S. Varma and P.K. Garg, *J. Indian Chem. Soc.* **58**, 980-981

2a. W.B. Jennings and C.J. Lovely, *Tetrahedron*, **47**, 5561-5568

2b. B.M. Trost and C. Marrs, *J. Org. Chem.* **56**, 6468-6470

3. G. Lui, D.A. Cogan, T.D. Owens, T.P. Tang and J.A. Ellman, *J. Org. Chem.* 1999, **64**, 1278-1284.
